# Supplementary material
Source: publisher site journal article supplement (https://www.dovepress.com/article/285595)
Supplement: Supplementary file 1 [file get_supplementary_file.php]

**Supplementary Table 1.** Epilepsy ICD-10 codes used for medical record-validated idiopathic generalized epilepsy syndromes stratified by coding before and after 2006.

| **ICD-10  code** | **CAE** | | | **JAE** | | | **JME** | | | **GTCS alone** | | |
| --- | --- | --- | --- | --- | --- | --- | --- | --- | --- | --- | --- | --- |
| 1994‒2005 | 2006‒19 | 1994‒2019 | 1994‒2005 | 2006‒19 | 1994‒2019 | 1994‒2005 | 2006‒19 | 1994‒2019 | 1994‒2005 | 2006‒19 | 1994‒2019 |
| G40 |  | ≤3 | ≤3 | ≤3 | 5 | 6 | 4 | 13 | 15 | ≤3 | 4 | 4 |
| G40.0 |  |  |  |  | 6 | 6 | ≤3 | 8 | 10 | ≤3 |  | ≤3 |
| G40.0A |  |  |  |  | ≤3 | ≤3 |  |  |  |  |  |  |
| G40.1 | ≤3 | ≤3 | ≤3 |  | ≤3 | ≤3 | ≤3 | 6 | 7 |  |  |  |
| G40.1A |  | ≤3 | ≤3 |  |  |  |  |  |  |  |  |  |
| G40.2 |  | ≤3 | ≤3 | 4 | 10 | 13 | ≤3 | 13 | 14 |  | ≤3 | ≤3 |
| G40.2A |  | ≤3 | ≤3 |  |  |  |  |  |  |  |  |  |
| G40.2B |  |  |  |  |  |  |  |  |  |  | ≤3 | ≤3 |
| G40.3 | 9 | 43 | 51 | 6 | 60 | 61 | 27 | 110 | 115 | 5 | 18 | 19 |
| G40.3A |  |  |  |  | ≤3 | ≤3 |  |  |  |  |  |  |
| G40.3B |  |  |  |  |  |  |  | ≤3 | ≤3 |  |  |  |
| G40.3C | 10 | 76 | 82 | ≤3 | 10 | 12 | 26 | 15 | 33 | ≤3 | ≤3 | ≤3 |
| G40.3D |  | ≤3 | ≤3 |  | ≤3 | ≤3 |  | 4 | 4 |  |  |  |
| G40.3E | ≤3 | 27 | 28 | ≤3 | 66 | 68 | ≤3 | 15 | 15 | ≤3 |  | ≤3 |
| G40.3F |  | ≤3 | ≤3 |  | 20 | 20 | 12 | 158 | 164 |  | 11 | 11 |
| G40.3G |  |  |  |  | ≤3 | ≤3 | ≤3 | 7 | 8 |  | 9 | 9 |
| G40.3L | 5 |  | 5 | ≤3 | ≤3 | 4 |  |  |  |  |  |  |
| G40.3N |  |  |  | ≤3 | ≤3 | ≤3 | ≤3 |  | ≤3 |  |  |  |
| G40.4 | ≤3 | 5 | 6 |  | 4 | 4 | ≤3 | 7 | 9 |  |  |  |
| G40.5 |  |  |  |  | ≤3 | ≤3 | ≤3 | 3 | 4 |  |  |  |
| G40.5A |  |  |  | ≤3 |  | ≤3 |  |  |  |  |  |  |
| G40.5L |  |  |  |  |  |  |  | ≤3 | ≤3 |  |  |  |
| G40.6 |  | ≤3 | ≤3 | ≤3 | 9 | 10 | 4 | 12 | 16 | ≤3 | ≤3 | 4 |
| G40.7 | 5 | 16 | 21 | ≤3 | 5 | 7 | ≤3 | ≤3 | 3 | ≤3 | ≤3 | ≤3 |
| G40.8 |  | ≤3 | ≤3 |  | ≤3 | ≤3 | 5 | ≤3 | 8 |  | ≤3 | ≤3 |
| G40.8B |  |  |  |  |  |  |  | ≤3 | ≤3 |  |  |  |
| G40.9 | 5 | 50 | 53 | 9 | 66 | 68 | 36 | 134 | 141 | 4 | 20 | 21 |
| G41 |  |  |  |  | ≤3 | ≤3 |  |  |  |  |  |  |
| G41.0 |  |  |  |  |  |  | ≤3 | 4 | 5 |  |  |  |
| G41.1 |  | ≤3 | ≤3 |  |  |  |  |  |  |  |  |  |
| G41.2 |  | ≤3 | ≤3 |  | ≤3 | ≤3 |  | ≤3 | ≤3 |  |  |  |
| G41.9 |  |  |  |  | ≤3 | ≤3 |  | ≤3 | ≤3 |  |  |  |

Abbreviations: CAE, childhood absence epilepsy; GTCS, generalized tonic-clonic seizure; JAE, juvenile absence epilepsy; JME, juvenile myoclonic epilepsy.

Supplementary Table 1 text: Each child could contribute with multiple codes but we included only the child's first *specific* epilepsy code. For example, a child with medical record-validated CAE was registered with G40.3C on 1 January 2009 and 4 April 2010, and G40.3E on 3 March 2011. The child would contribute with one G40.3C and one G40.3E code.
